# Supplementary material
Source: Springer Nature journal article supplement (https://www.springermedizin.de/resource/supplementary/12947_2013_462_MOESM3_ESM.pdf/9555802)

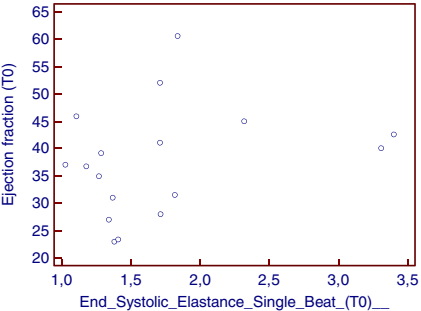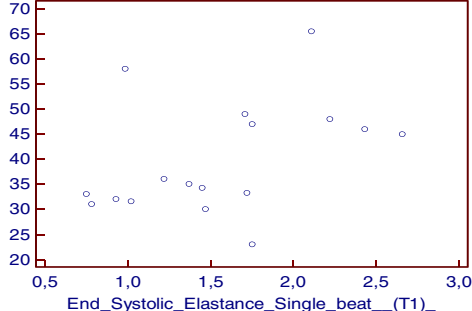

Supplement: MOESM3 [file 9555802]
